# Supplementary material
Source: PubMed Central journal article supplement (PMC6868301)
Supplement: NIHMS1050032-supplement-Supp_FigS3.pdf [file NIHMS1050032-supplement-Supp_FigS3.pdf]

## **Resource Guide: Utilities**

### **Eversource Energy Discount Rate Program**

**Description:** Offers discount rates on monthly utility bills to qualifying low-income consumers. The discount rates may also be applied to past bills in some cases.

**Contact:** 1-800-592-2000 Monday-Friday from 9:00 am to 5:00 pm  
[www.eversource.com/nstar/CustomerCare/Residential/DiscountRate](http://www.eversource.com/nstar/CustomerCare/Residential/DiscountRate)

**Eligibility:** Must be an Eversource Energy customer, meet household income requirements, and must qualify to receive fuel assistance benefits or be enrolled in a government benefit or subsidy (i.e. TAFDC, SNAP, Head Start)

**Cost:** Free

### **Low-Income Home Energy Assistance Program (LIHEAP)**

**Description:** Provides heating bill payment assistance to low-income residents of Boston, Brookline, and Newton during the winter months (November 1-April 30). Individuals and families who are not typically eligible for other government assistance programs may still be eligible for LIHEAP.

**Contact:** 1-800-632-8175, [www.benefitsapplication.com/contact](http://www.benefitsapplication.com/contact)

**Eligibility:** Cannot exceed Annual Household Income Levels \$62,727 for a family of 4

**Cost:** Free

### **National Grid Discount Rate Application**

**Description:** Offers discount rates on monthly utility bills to qualifying low-income consumers. The discount rates may also be applied to past bills in some cases.

**Contact:** 1-800-322-3223  
[www9.nationalgridus.com/non\\_html/On\\_Demand\\_Electric\\_Initial%20v052209.pdf](http://www9.nationalgridus.com/non_html/On_Demand_Electric_Initial%20v052209.pdf)

**Eligibility:** Must be a National Grid customer, household income cannot exceed 60% of the state median income level and/or must qualify to receive fuel assistance benefits or be enrolled in a government benefit/subsidy program (i.e. TAFDC, SNAP, Head Start)

**Cost:** Free

### **Utilities Shut-Off Protection and Restoration of Services**

**Description:** A letter from your healthcare provider that may prevent utilities from being shut off and help you work out a payment plan with your utilities company. The letter will not erase any debt owed.

**Contact:** Please contact your care provider at Boston Medical Center

**Eligibility:** Have a health condition that relies on utilities for treatment

## **Resource Guide: Employment**

### **Boston Career Link**

**Description:** Provides free access to a broad range of career counseling and training services including job listings and workshops. Members can also apply for financial assistance for job training.

**Services:** Connects you directly to employers

**Contact:** 617-541-1400, [www.bostoncareerlink.org](http://www.bostoncareerlink.org)

**Location:** 1010 Harrison Avenue, Roxbury, MA 02119

**Hours:** It is highly recommended that clients attend a one-hour orientation meeting.

- For people not collecting unemployment: Monday and Friday at 9:30 am, Tuesday at 5:30 pm
- For people collecting unemployment: you should receive a letter with seminar time

Eligibility: Must have a social security number

**Career Collaborative**

Description: Offers a free highly interactive four-week job search/job readiness course  
Services: Helps with job retention and career goals post-employment via an intensive mentoring program  
Contact: 617-424-6616, [www.careercollaborative.org](http://www.careercollaborative.org)  
Location: 77 Summer St, 11<sup>th</sup> floor, Downtown Boston, MA 02110  
Hours: Mon-Fri 9:00 am to 5:00 pm  
Eligibility: Have a social security number and stable housing (Shelter is acceptable), without a bachelor's degree or higher from a college in the US, and fluent in English. Clients must attend a four-week program every day Monday-Friday from 9:00 am to 2:00 pm

**JVS Career Solutions (formerly known as The Work Place)**

Description: Free career center that offers skills training, recruitment fairs, job search help, and specialized services for homeless clients, ex-offenders, veterans, and young adults.  
Services: Helps individuals find current job openings, assess their skill levels and interests, and enter education and training programs  
Contact: 617-399-3100, [www.careersolution.org](http://www.careersolution.org)  
Location: 75 Federal Street, Boston, MA 02110  
Hours: Monday, Tuesday, Friday from 9:00 am to 5:00 pm; Wednesday from 9:00 am to 7:00 pm; Thursday from 10:00 am to 5:00 pm  
Eligibility: Must have a social security number

**Goodwill:**

Description: Goodwill invests in a wide variety of programs to help community members advance their careers and find financial stability  
Services: Immediate help finding a job  
Contact: 1-800-466-3945, [www.goodwill.org/find-jobs-and-services](http://www.goodwill.org/find-jobs-and-services)
