# Supplementary material
Source: PubMed Central journal article supplement (PMC6868301)

A

Clinic Flow with feedback

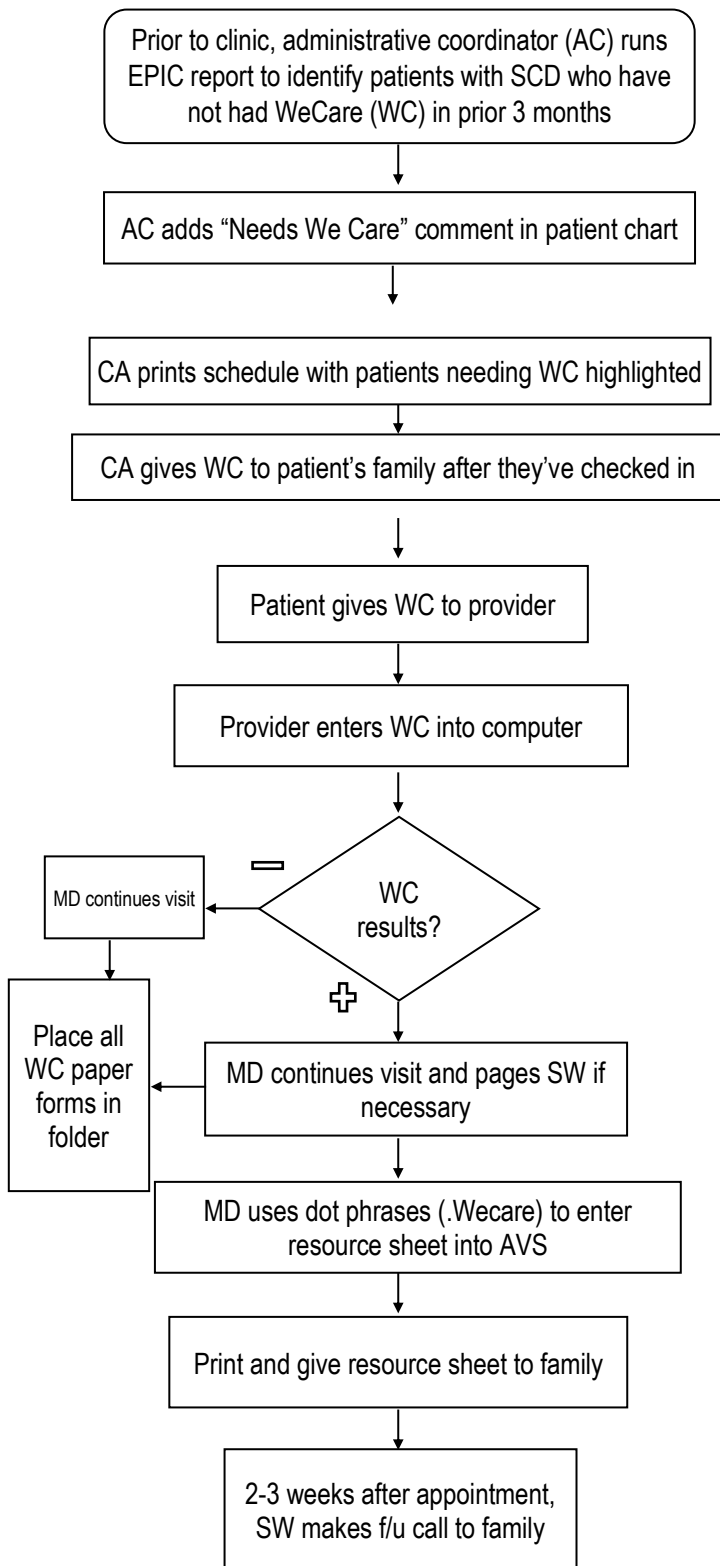

| Date:                                                 |                                                                                                  |
|-------------------------------------------------------|--------------------------------------------------------------------------------------------------|
| Process                                               | Comments: who completed this, amount of time, need for clarification, steps for improvement, etc |
| SW identifies checked-in pts and gives them WC survey |                                                                                                  |
| Pt completes WC and returns to provider               |                                                                                                  |
| Provider enters WC into computer                      |                                                                                                  |
| Dot phrase used to obtain resource sheet              |                                                                                                  |
| Resource sheet printed                                |                                                                                                  |
| Resource sheet provided to family                     |                                                                                                  |

B

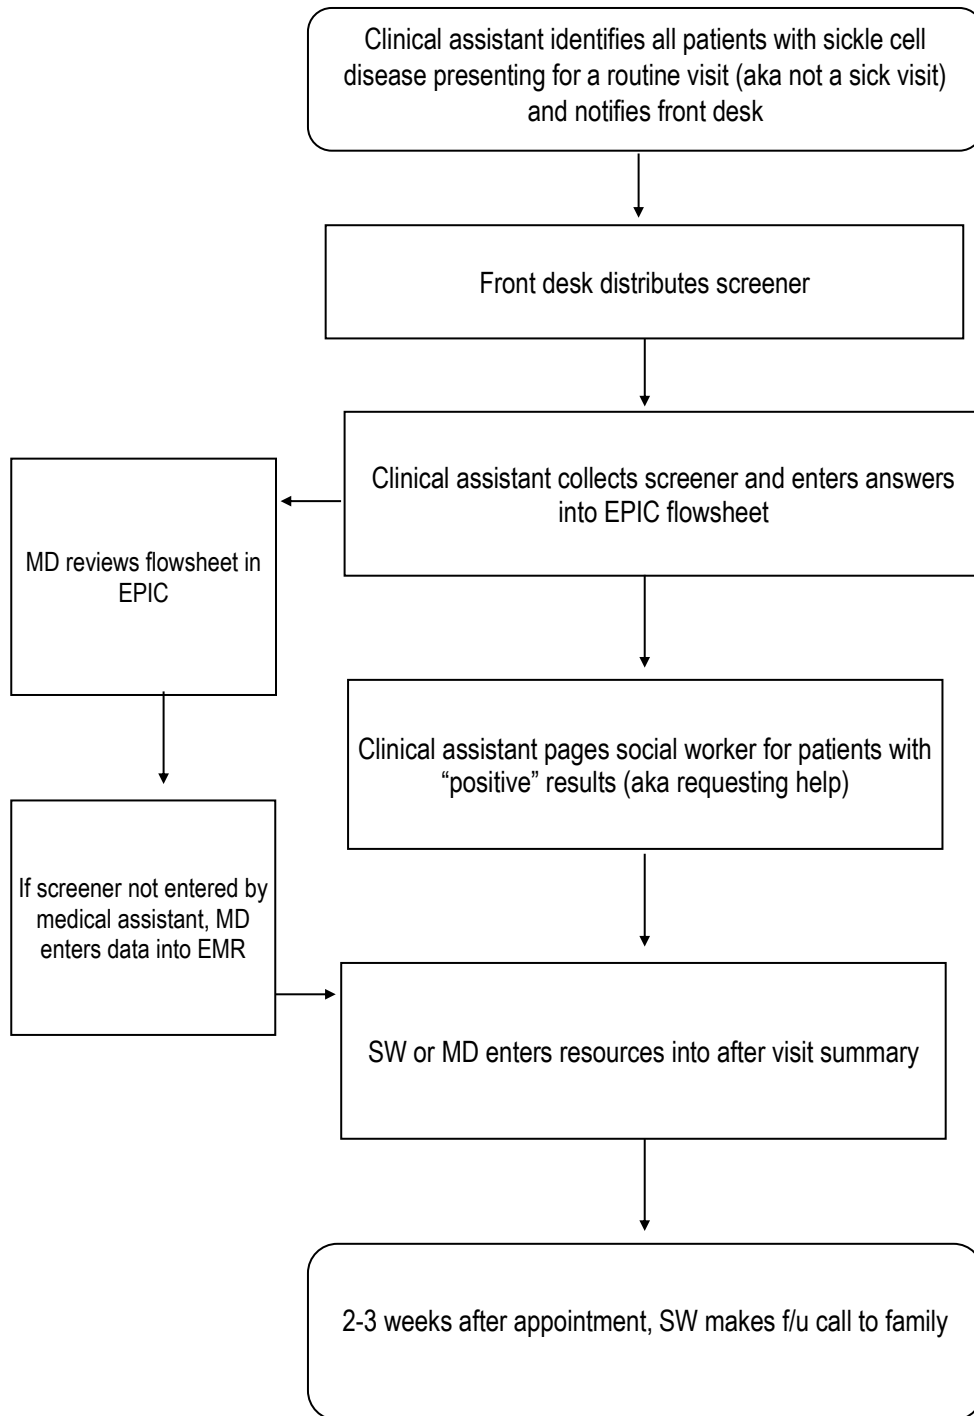

Supplement: NIHMS1050032-supplement-Supp_FigS4.pdf [file NIHMS1050032-supplement-Supp_FigS4.pdf]
